# Supplementary material for: 3D hierarchical porous carbon matching ionic liquid with ultrahigh specific surface area and appropriate porous distribution for supercapacitors
Source: Royal Society of Chemistry journal article supplement (doi:10.1039/d1nr01848e), 2021-01-01
Supplement: d1nr01848e1.pdf [file d1nr01848e1.pdf]

3D hierarchical porous carbon matching ionic liquid with  
ultrahigh specific surface area and appropriate porous  
distribution for supercapacitors

Quanzhou Du, Yuhua Zhao, Kelei Zhuo,\* Yujuan Chen, Lifang Yang, Chunfeng

Wang, and Jianji Wang\*

## 1. Electrochemical Measurements

The complex form of capacitance  $C(\omega)$  is dependent on the real part of the capacitance  $C'(\omega)$  and the imaginary part of the capacitance  $C''(\omega)$ , which is defined as follows

$$C(\omega) = C'(\omega) - jC''(\omega) \quad (1)$$

$$C'(\omega) = \frac{-Z''(\omega)}{\omega|Z(\omega)|^2} \quad (2)$$

$$C''(\omega) = \frac{Z'(\omega)}{\omega|Z(\omega)|^2} \quad (3)$$

where  $Z'(\omega)$  is the real component and  $Z''(\omega)$  is the imaginary component of the complex impedance, respectively. The angular frequency  $\omega$  is determined by  $\omega = 2\pi f$ .  $\tau_0$  is the relaxation time constant which is calculated by  $\tau_0 = 1/f_0$

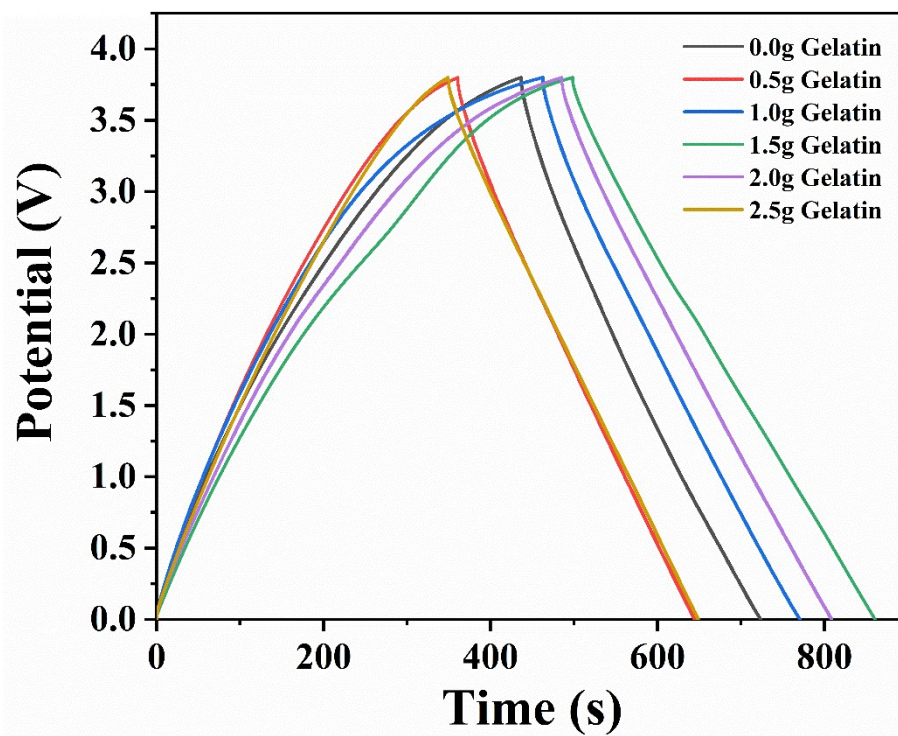

Fig. S1. Galvanostatic charge-discharge (GCD) curves for different dosage of gelatin at 1 A g<sup>-1</sup>.

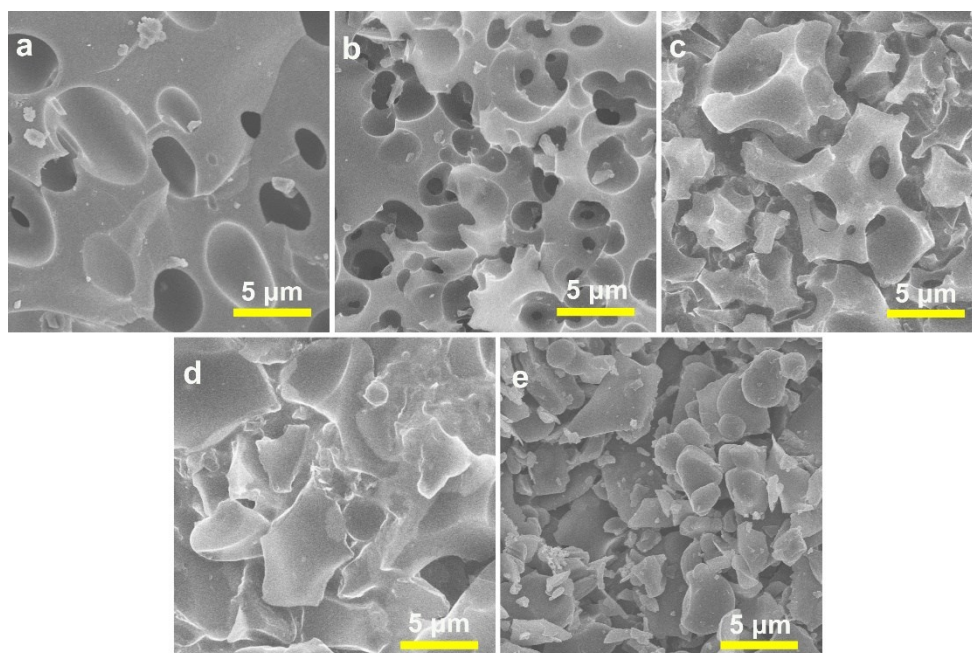

Fig. S2. Morphology characterization of HPC: a) SEM image of HPC-0; b) SEM image of HPC-1.0; c) SEM image of HPC-2.0; d) SEM image of HPC-3.0; e) SEM image of HPC-4.0.

**Table S1** The contents of C element, N element and O element from XPS survey spectra.

| Sample  | C%    | N%   | O%    |
|---------|-------|------|-------|
| HPC-0   | 76.44 | 3.93 | 19.63 |
| HPC-0.5 | 83.79 | 5.46 | 10.75 |
| HPC-1.0 | 88.31 | 2.79 | 8.90  |
| HPC-1.5 | 88.54 | 2.60 | 8.86  |
| HPC-2.0 | 86.15 | 2.55 | 11.30 |
| HPC-2.5 | 86.99 | 2.63 | 10.38 |
| HPC-3.0 | 85.48 | 3.30 | 11.22 |
| HPC-3.5 | 83.46 | 3.15 | 13.39 |
| HPC-4.0 | 84.40 | 3.11 | 12.49 |

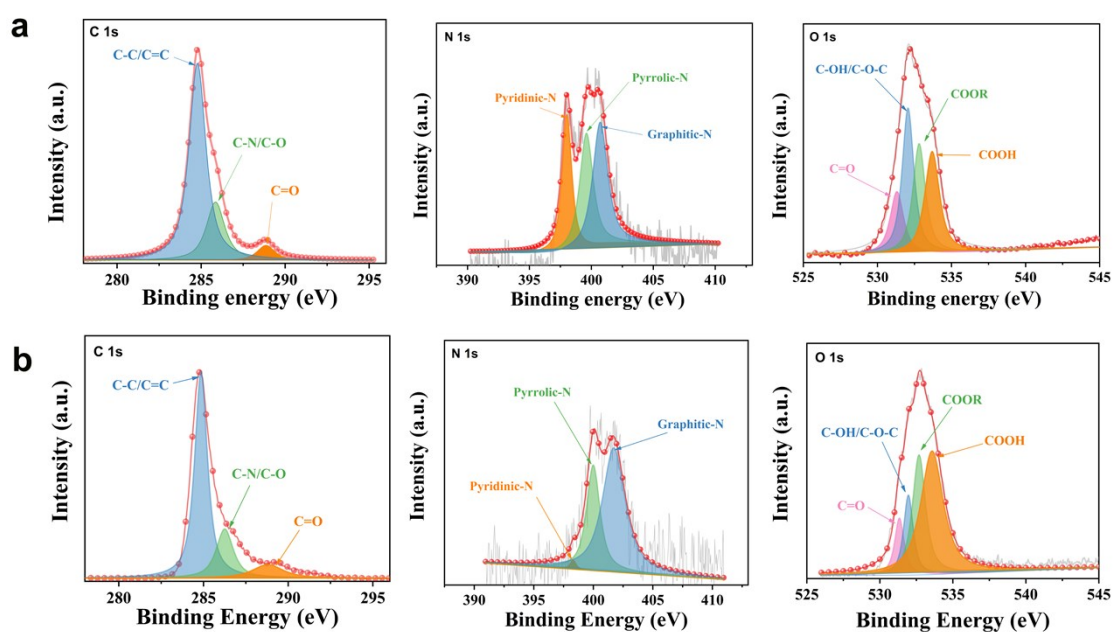

Fig. S3 XPS survey spectra: a) C 1s, N 1s, O 1s spectra of HPC-0; b) C 1s, N 1s, O 1s spectra of HPC-3.5.

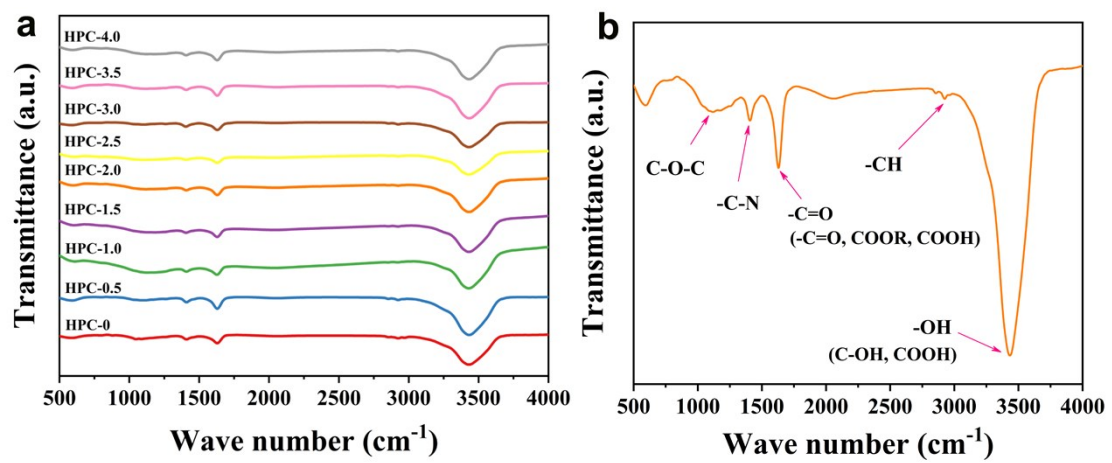

Fig. S4 IR spectroscopy: a) IR spectra of all HPCs; b) IR spectra of HPC-3.5.

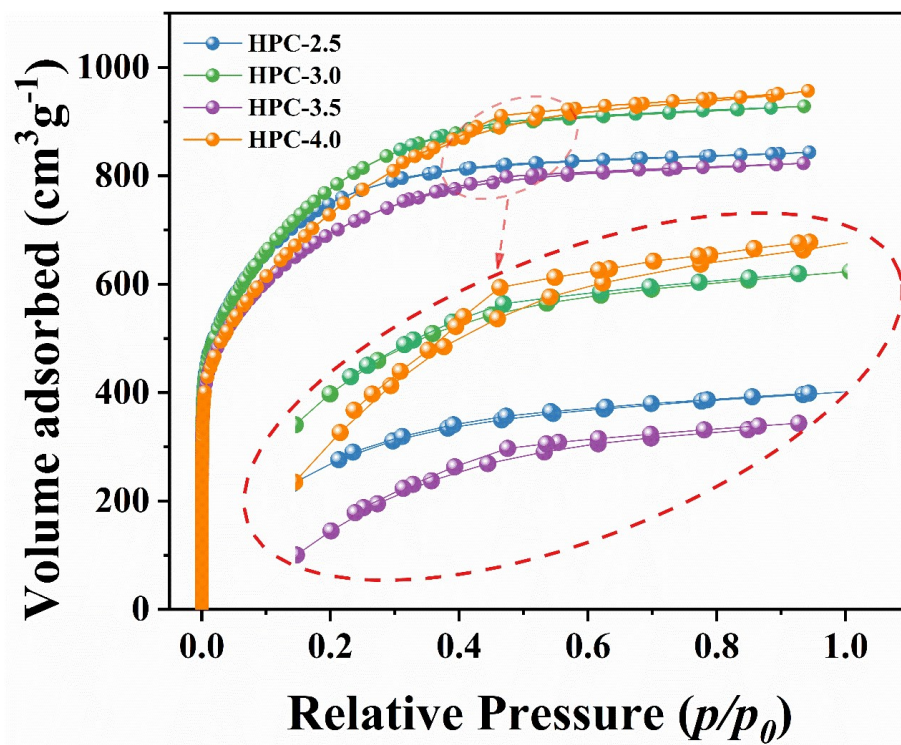

Fig. S5 Magnification of N<sub>2</sub> adsorption–desorption isotherms.

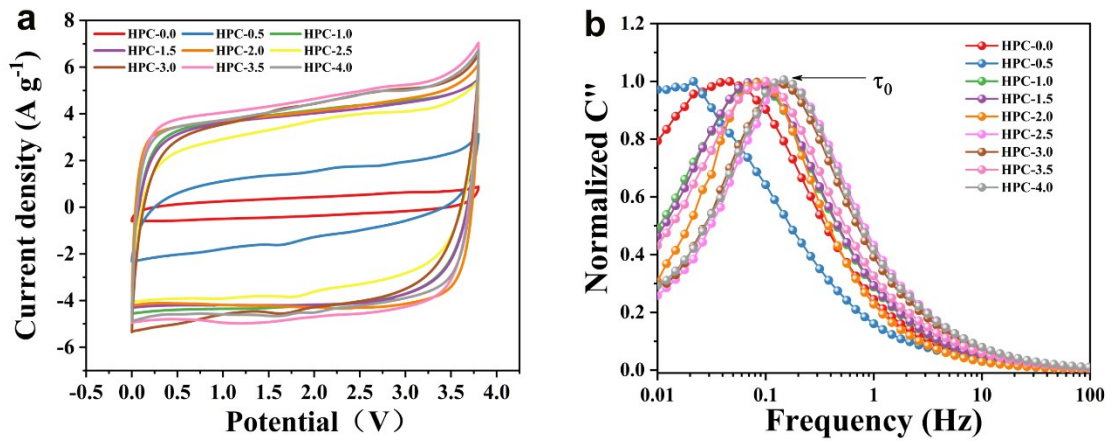

Fig. S6 a) Cyclic voltammety (CV) curve of all HPC materials at scan rates of  $50 \text{ mV s}^{-1}$ . b) The normalized imaginary part capacitances of all HPC materials.

The same conclusions can be obtained from Fig. S7b as from Fig. 5c: HPC-3.5 has a larger  $\tau_0$  than HPC-3.0 and HPC-4.0 dominated by mesopores, due to a good matching of the micropores size with  $\text{EMIMBF}_4$  electrolyte.



**Table S2** Summary of the supercapacitive performance of representative porous carbon electrodes in ionic liquid electrolytes.

| Material                                                   | IL                  | Voltage window | Specific capacitance                            | Reference |
|------------------------------------------------------------|---------------------|----------------|-------------------------------------------------|-----------|
| mesoporous carbon nanosheets                               | EMIMBF <sub>4</sub> | 3.5 V          | 130 F g <sup>-1</sup> at 1 A g <sup>-1</sup>    | 2         |
| mesoporous activated carbon fibers                         | EMIMBF <sub>4</sub> | 4 V            | 204 F g <sup>-1</sup> at 0.5 A g <sup>-1</sup>  | 3         |
| porous carbon nanosheets                                   | EMIMBF <sub>4</sub> | 3 V            | 173 F g <sup>-1</sup> at 0.25 A g <sup>-1</sup> | 4         |
| ordered mesoporous and microporous carbons                 | EMIMBF <sub>4</sub> | 3.5 V          | 138 F g <sup>-1</sup> at 0.1 A g <sup>-1</sup>  | 5         |
| 3D cross coupled macro-mesoporous carbon                   | EMIMBF <sub>4</sub> | 4 V            | 166 F g <sup>-1</sup> at 0.5 A g <sup>-1</sup>  | 6         |
| salt-templated carbon materials                            | EMIMBF <sub>4</sub> | 3.5 V          | 178 F g <sup>-1</sup> at 0.2 A g <sup>-1</sup>  | 7         |
| porosity adjustable graphene monoliths                     | EMIMBF <sub>4</sub> | 4 V            | 172 F g <sup>-1</sup> at 0.2 A g <sup>-1</sup>  | 8         |
| N, S dual-doped ordered mesoporous carbon/MnO <sub>2</sub> | EMIMBF <sub>4</sub> | 3.5 V          | 200 F g <sup>-1</sup> at 2 mV s <sup>-1</sup>   | 9         |
| enteromorpha derived carbons                               | EMIMBF <sub>4</sub> | 3 V            | 201 F g <sup>-1</sup> at 1 A g <sup>-1</sup>    | 10        |
| hierarchical porous honeycomb-like carbon                  | EMIMBF <sub>4</sub> | 3.5            | 174 F g <sup>-1</sup> at 1 A g <sup>-1</sup>    | 11        |
| highly porous carbon                                       | EMIMBF <sub>4</sub> | 4 V            | 224 A g <sup>-1</sup> at 0.1 A g <sup>-1</sup>  | 12        |
| HPC                                                        | EMIMBF <sub>4</sub> | 3.8 V          | 216.5 A g <sup>-1</sup> at 1 A g <sup>-1</sup>  | This work |

**Table S3** Summary of energy density and power density of symmetric supercapacitors in ionic liquid electrolytes.

| Material                                   | Energy density                                        | Power density                                        | References |
|--------------------------------------------|-------------------------------------------------------|------------------------------------------------------|------------|
| mesoporous carbon nanosheets               | 55.3 Wh kg <sup>-1</sup><br>46 Wh kg <sup>-1</sup>    | 0.87 kW kg <sup>-1</sup><br>236 kW kg <sup>-1</sup>  | 2          |
| mesoporous activated carbon fibers         | 113 Wh kg <sup>-1</sup><br>9.2 Wh kg <sup>-1</sup>    | 1 kW kg <sup>-1</sup><br>83 kW kg <sup>-1</sup>      | 3          |
| porous carbon nanosheets                   | 54.1 Wh kg <sup>-1</sup><br>25.4 Wh kg <sup>-1</sup>  | 0.375 kW kg <sup>-1</sup><br>15 kW kg <sup>-1</sup>  | 4          |
| ordered mesoporous and microporous carbons | 59 Wh kg <sup>-1</sup><br>25 Wh kg <sup>-1</sup>      | 0.1 kW kg <sup>-1</sup><br>18 kW kg <sup>-1</sup>    | 5          |
| 3D cross coupled macro-mesoporous carbon   | 92 Wh kg <sup>-1</sup><br>39 Wh kg <sup>-1</sup>      | 1 kW kg <sup>-1</sup><br>200 kW kg <sup>-1</sup>     | 6          |
| salt-templated carbon materials            | 76 Wh kg <sup>-1</sup><br>39 Wh kg <sup>-1</sup>      | 0.2 kW kg <sup>-1</sup><br>9 kW kg <sup>-1</sup>     | 7          |
| enteromorpha derived carbons               | 62 Wh kg <sup>-1</sup><br>24 Wh kg <sup>-1</sup>      | 0.75 kW kg <sup>-1</sup><br>60 kW kg <sup>-1</sup>   | 10         |
| hierarchical porous honeycomb-like carbon  | 79 Wh kg <sup>-1</sup><br>64 Wh kg <sup>-1</sup>      | 0.87 kW kg <sup>-1</sup><br>19.5 kW kg <sup>-1</sup> | 11         |
| nanofibrous chitin microspheres            | 58.7 Wh kg <sup>-1</sup><br>38 Wh kg <sup>-1</sup>    | 0.3 kW kg <sup>-1</sup><br>7.1 kW kg <sup>-1</sup>   | 13         |
| N, O co-doped honeycomb porous carbon      | 94.1 Wh kg <sup>-1</sup><br>42.5 Wh kg <sup>-1</sup>  | 0.35 kW kg <sup>-1</sup><br>17.5 kW kg <sup>-1</sup> | 14         |
| 3D hierarchical porous carbon materials    | 46.8 Wh kg <sup>-1</sup><br>22.9 Wh kg <sup>-1</sup>  | 6.2 kW kg <sup>-1</sup><br>25.4 kW kg <sup>-1</sup>  | 15         |
| HPC                                        | 108.6 Wh kg <sup>-1</sup><br>42.8 Wh kg <sup>-1</sup> | 0.96 kW kg <sup>-1</sup><br>76.4 kW kg <sup>-1</sup> | This work  |

## References

1. Taberna, P. L.; Simon, P.; Fauvarque, J. F., Electrochemical Characteristics and Impedance Spectroscopy Studies of Carbon-Carbon Supercapacitors. *Journal of The Electrochemical Society* **2003**, *150* (3), A292.
2. Wang, J.; Xu, Y.; Ding, B.; Chang, Z.; Zhang, X.; Yamauchi, Y.; Wu, K. C., Confined Self-Assembly in Two-Dimensional Interlayer Space: Monolayered Mesoporous Carbon Nanosheets with In-Plane Orderly Arranged Mesopores and a Highly Graphitized Framework. *Angew Chem Int Ed Engl* **2018**, *57* (11), 2894-2898.
3. Hurilechaoketu; Wang, J.; Cui, C.; Qian, W., Highly electroconductive mesoporous activated carbon fibers and their performance in the ionic liquid-based electrical double-layer capacitors. *Carbon* **2019**, *154*, 1-6.
4. Chen, C.; Yu, D.; Zhao, G.; Du, B.; Tang, W.; Sun, L.; Sun, Y.; Besenbacher, F.; Yu, M., Three-dimensional scaffolding framework of porous carbon nanosheets derived from plant wastes for high-performance supercapacitors. *Nano Energy* **2016**, *27*, 377-389.
5. Yan, R.; Heil, T.; Presser, V.; Walczak, R.; Antonietti, M.; Oschatz, M., Ordered Mesoporous Carbons with High Micropore Content and Tunable Structure Prepared by Combined Hard and Salt Templating as Electrode Materials in Electric Double-Layer Capacitors. *Advanced Sustainable Systems* **2018**, *2* (2).
6. Li, J.; Wang, N.; Tian, J.; Qian, W.; Chu, W., Cross-Coupled Macro-Mesoporous Carbon Network toward Record High Energy-Power Density Supercapacitor at 4 V. *Advanced Functional Materials* **2018**, *28* (51), 1806153.
7. Yan, R.; Antonietti, M.; Oschatz, M., Toward the Experimental Understanding of the Energy Storage Mechanism and Ion Dynamics in Ionic Liquid Based Supercapacitors. *Advanced Energy Materials* **2018**, *8* (18).
8. Li, H.; Tao, Y.; Zheng, X.; Luo, J.; Kang, F.; Cheng, H.-M.; Yang, Q.-H., Ultra-thick graphene bulk supercapacitor electrodes for compact energy storage. *Energy & Environmental Science* **2016**, *9* (10), 3135-3142.
9. Lai, F.; Feng, J.; Yan, R.; Wang, G.-C.; Antonietti, M.; Oschatz, M., Breaking the Limits of Ionic Liquid-Based Supercapacitors: Mesoporous Carbon Electrodes Functionalized with Manganese Oxide Nanosplotches for Dense, Stable, and Wide-Temperature Energy Storage. *Advanced Functional Materials* **2018**, *28* (36).
10. Yu, W.; Wang, H.; Liu, S.; Mao, N.; Liu, X.; Shi, J.; Liu, W.; Chen, S.; Wang, X., N, O-codoped hierarchical porous carbons derived from algae for high-capacity supercapacitors and battery anodes. *Journal of Materials Chemistry A* **2016**, *4* (16), 5973-5983.
11. Deng, X.; Li, J.; Zhu, S.; Ma, L.; Zhao, N., Boosting the capacitive storage performance of MOF-derived carbon frameworks via structural modulation for supercapacitors. *Energy Storage Materials* **2019**, *23*, 491-498.
12. Wang, X.; Li, Y.; Lou, F.; Melandsø Buan, M. E.; Sheridan, E.; Chen, D., Enhancing capacitance of supercapacitor with both organic electrolyte and ionic liquid electrolyte on a biomass-derived carbon. *RSC Advances* **2017**, *7* (38), 23859-23865.
13. Duan, B.; Gao, X.; Yao, X.; Fang, Y.; Huang, L.; Zhou, J.; Zhang, L., Unique elastic N-doped carbon nanofibrous microspheres with hierarchical porosity derived from renewable chitin for high rate supercapacitors. *Nano Energy* **2016**, *27*, 482-491.

14. Song, Z.; Li, L.; Zhu, D.; Miao, L.; Duan, H.; Wang, Z.; Xiong, W.; Lv, Y.; Liu, M.; Gan, L., Synergistic design of a N, O co-doped honeycomb carbon electrode and an ionogel electrolyte enabling all-solid-state supercapacitors with an ultrahigh energy density. *Journal of Materials Chemistry A* **2019**, *7* (2), 816-826.
15. Guo, N.; Li, M.; Sun, X.; Wang, F.; Yang, R., Enzymatic hydrolysis lignin derived hierarchical porous carbon for supercapacitors in ionic liquids with high power and energy densities. *Green Chemistry* **2017**, *19* (11), 2595-2602.
